# Supplementary material
Source: ML conference proceedings conference paper supplement (https://proceedings.neurips.cc/paper_files/paper/2014/hash/b51a15f382ac914391a58850ab343b00-Abstract.html)
Supplement: Supplementary file [file b51a15f382ac914391a58850ab343b00-Supplemental.zip]

---

# Supplementary Material for “Generalized Unsupervised Manifold Alignment”

---

Zhen Cui<sup>1,2</sup> Hong Chang<sup>1</sup> Shiguang Shan<sup>1</sup> Xilin Chen<sup>1</sup>

<sup>1</sup> Key Lab of Intelligent Information Processing of Chinese Academy of Sciences (CAS),  
Institute of Computing Technology, CAS, Beijing, China

<sup>2</sup> School of Computer Science and Technology, Huaqiao University, Xiamen, China  
{zhen.cui, hong.chang}@vipl.ict.ac.cn; {sgshan, xlchen}@ict.ac.cn

## 1 GUMA Algorithm

We conclude the generalized unsupervised manifold alignment algorithm in the following Alg.2.

---

### Algorithm 2 GUMA algorithm

---

**Input:** Two datasets  $\mathbf{X}$  and  $\mathbf{Z}$ , dimension  $d$  of embedding space.

- 1: Initialize: matching matrix  $\mathbf{F} \in \Pi$  and linear transforms  $\mathbf{P}_x, \mathbf{P}_z$ ;
- 2: Compute  $\mathbf{K}_x, \mathbf{K}_z$  with global geometry structures;
- 3: **repeat**
- 4:   Solve  $\mathbf{F}$  by Alg.1;
- 5:   Solve  $\mathbf{P}_x, \mathbf{P}_z$  by eigenvalue decomposition on Eqn.(11);
- 6: **until** convergence

**Output:**  $\mathbf{F}$  and  $\mathbf{P}_x, \mathbf{P}_z$

---

## 2 Examples of Face Image Sets Alignment

In Fig.1, we give some aligned examples of face image sets from Multi-PIE [1]. Red box marks a mismatch of facial expressions, and blue box marks a mismatch of facial poses. As a whole, mismatched images are very similar in our intuition.

## 3 Alignment Results of Protein Structures

Here we use three sequences, *i.e.*, 1G7O-01, 1G7O-10, and 1G7O-21, which are provided by the authors of [3], Fig.2, 3 and 4 provide visual aligned results in 3D, 2D and 1D space by performing manifold alignment of any two protein sequences among 1G7O-01, 1G7O-10 and 1G7O-21.

## References

- [1] R. Gross, I. Matthews, J. Cohn, T. Kanade, and S. Baker. Multi-pie. *Image and Vision Computing*, 28(5):807–813, 2010.
- [2] Y. Pei, F. Huang, F. Shi, and H. Zha. Unsupervised image matching based on manifold alignment. *T-PAMI*, 34(8):1658–1664, 2012.
- [3] C. Wang and S. Mahadevan. Manifold alignment without correspondence. In *IJCAI*, 2009.

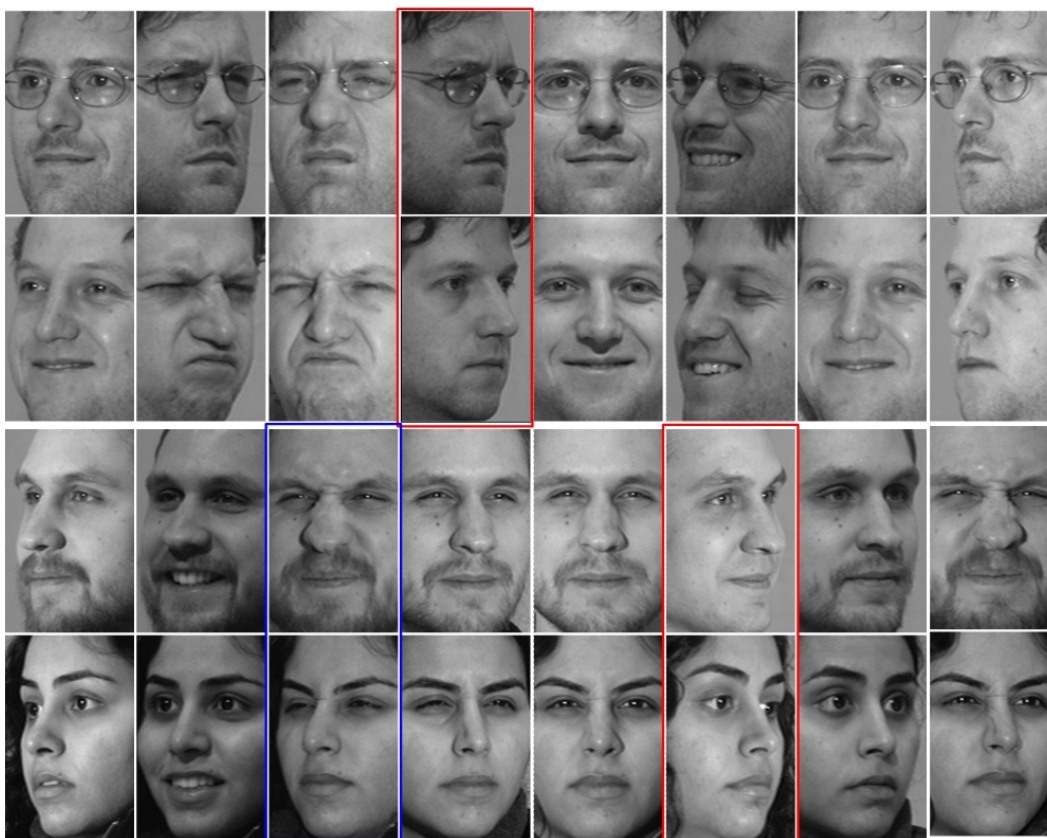

Figure 1: Examples of facial pose and expression matching. Red box marks a mismatch of facial expressions. Blue box marks a mismatch of facial poses.

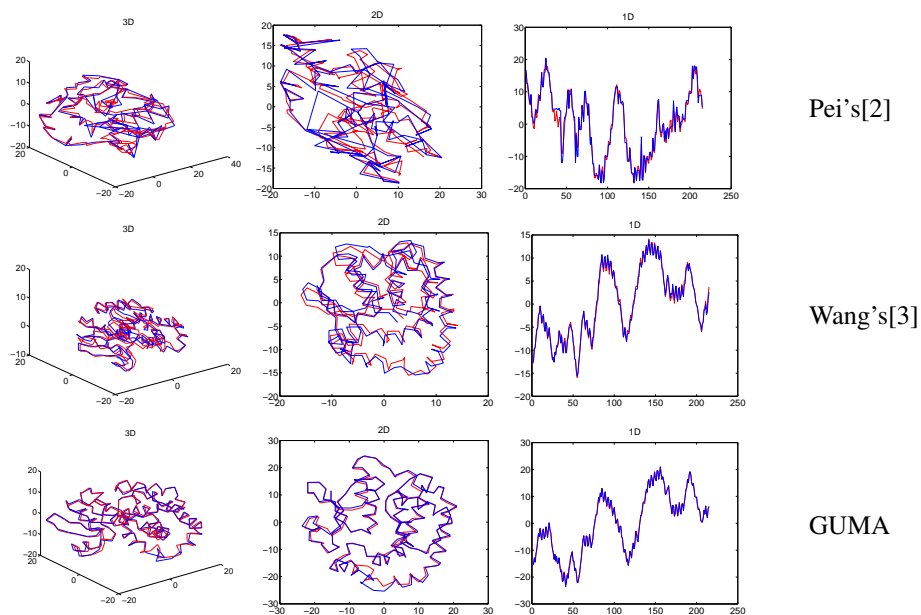

Figure 2: The alignment of protein sequences: 1G7O-01 and 1G7O-10. After alignment, the overlapping of two sequences in 3D, 2D and 1D space are shown by columns from left to right.

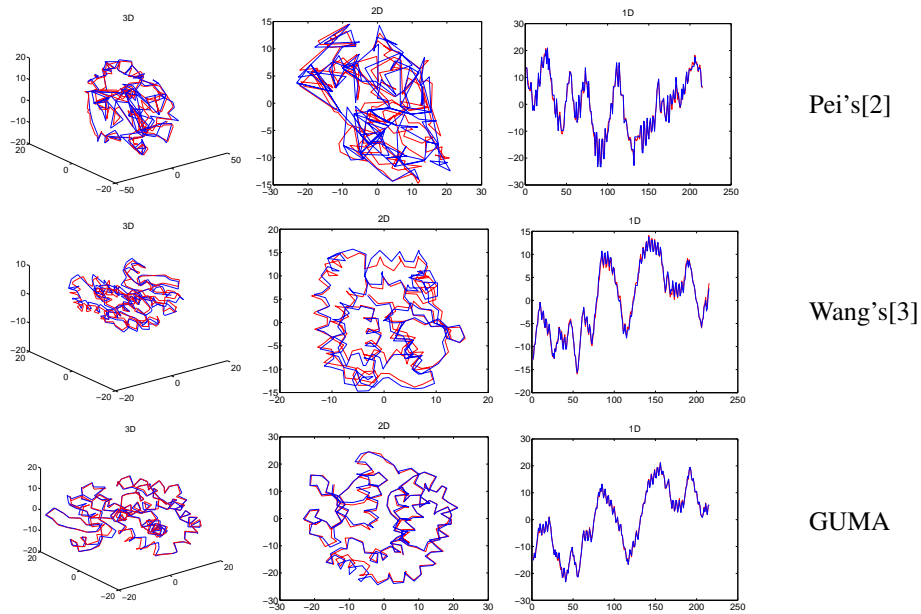

Figure 3: The alignment of protein sequences: 1G7O-01 and 1G7O-21. After alignment, the overlapping of two sequences in 3D, 2D and 1D space are shown by columns from left to right.

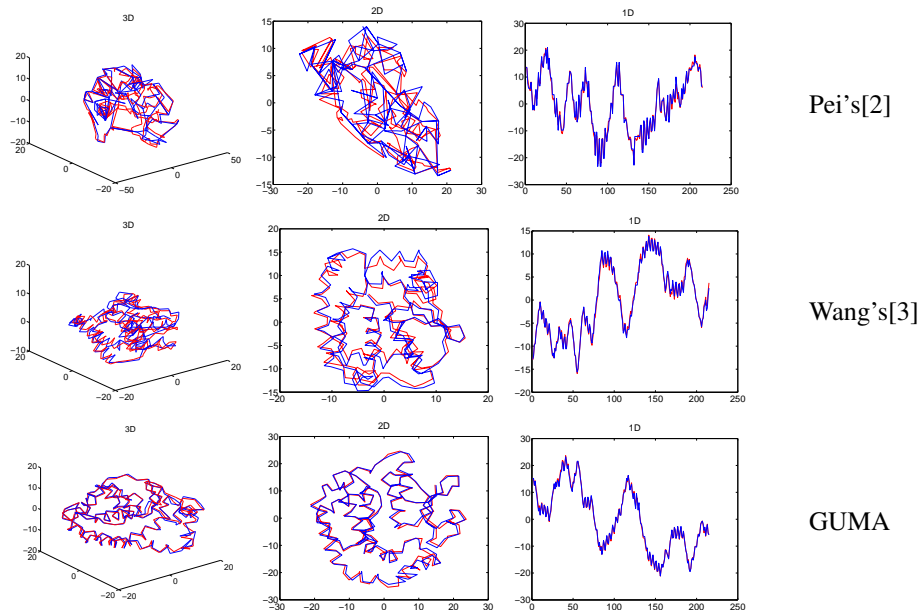

Figure 4: The alignment of protein sequences: 1G7O-10 and 1G7O-21. After alignment, the overlapping of two sequences in 3D, 2D and 1D space are shown by columns from left to right.
